# Supplementary material for: A multi-functional iodoplumbate-based hybrid crystal: 1-propyl-4-aminopyridinium triiodoplumbate
Source: Royal Society of Chemistry journal article supplement (doi:10.1039/c7ra03524a), 2017-01-01
Supplement: c7ra03524a1.pdf [file c7ra03524a1.pdf]

# **A multi-functional iodoplumbate-based hybrid crystal: 1-propyl-4-aminopyridinium triiodoplumbate**

Hai-Bao Duan,<sup>\*,a</sup> Shan-Shan Yu,<sup>a</sup> Shao-Xian Liu<sup>a</sup>, Hui Zhang<sup>\*a</sup>

School of Environmental Science, Nanjing Xiaozhuang University, Nanjing 211171,  
P.R.China

Tel.: +86 25 86178274

Fax: +86 25 86178274

E-mail: [duanhaibao4660@163.com](mailto:duanhaibao4660@163.com)

### **Preparation of 1**

A mixture of  $\text{PbI}_2$  (0.926 g, 2 mmol) and KI (3.320 g, 20 mmol) with molar ratio of 1:10 in DMF (50 mL) was heated under reflux with stirring for 25 min. After the clear yellow solution was formed and a DMF solution  $[\text{C}_3\text{-Apy}]\text{Br}$  (2 mmol) was slowly added to the mixture, which was stirred for 8 h and filtered to remove insoluble compounds. The filtrate was evaporated at ambient temperature for 14 days to produce light yellowish needle-shaped crystals in ca. 75% yield. The crystal was washed with DMF.

Table S1 Crystallographic data and refinement parameter of **1** at room temperature

|                                             |                                                                               |                                                                               |
|---------------------------------------------|-------------------------------------------------------------------------------|-------------------------------------------------------------------------------|
| Temperature (K)                             | 293(2)                                                                        | 120(2)                                                                        |
| Wavelength (Å)                              | 0.71073                                                                       | 0.71073                                                                       |
| Empirical formula                           | C <sub>16</sub> H <sub>26</sub> I <sub>6</sub> N <sub>4</sub> Pb <sub>2</sub> | C <sub>16</sub> H <sub>26</sub> I <sub>6</sub> N <sub>4</sub> Pb <sub>2</sub> |
| Formula weight                              | 1450.2                                                                        | 1450.2                                                                        |
| CCDC no.                                    | 1509582                                                                       | 1510132                                                                       |
| Crystal system                              | Orthorhombic                                                                  | Orthorhombic                                                                  |
| Space group                                 | Pnma                                                                          | Pnma                                                                          |
| <i>a</i> (Å)                                | 7.8748(5)                                                                     | 7.8013(11)                                                                    |
| <i>b</i> (Å)                                | 10.4050(8)                                                                    | 10.2985(15)                                                                   |
| <i>c</i> (Å)                                | 19.3554(17)                                                                   | 19.117(3)                                                                     |
| $\alpha$ (°)                                | 90                                                                            | 90                                                                            |
| $\beta$ (°)                                 | 90                                                                            | 90                                                                            |
| $\gamma$ (°)                                | 90                                                                            | 90                                                                            |
| <i>V</i> (Å <sup>3</sup> )/Z                | 1585.9(2)/2                                                                   | 1535.9(4)/2                                                                   |
| $\rho$ (g·cm <sup>-3</sup> )                | 3.307                                                                         | 3.136                                                                         |
| <i>F</i> (000)                              | 1264.0                                                                        | 1264.0                                                                        |
| Abs. coeff. (mm <sup>-1</sup> )             | 16.452                                                                        | 16.988                                                                        |
| $\theta$ Ranges (data collection;<br>°)     | 2.29 - 25.67                                                                  | 2.15 - 27.57                                                                  |
| Index ranges                                | -9 ≤ <i>h</i> ≤ 9                                                             | -10 ≤ <i>h</i> ≤ 10                                                           |
|                                             | -10 ≤ <i>k</i> ≤ 12                                                           | -13 ≤ <i>k</i> ≤ 13                                                           |
|                                             | -23 ≤ <i>l</i> ≤ 19                                                           | -24 ≤ <i>l</i> ≤ 24                                                           |
| <i>R</i> <sub>int</sub>                     | 0.1229                                                                        | 0.0435                                                                        |
| Independent<br>reflections/restraints/param | 1596/0/102                                                                    | 1870/0/83                                                                     |

eters

|                                    |                |                |
|------------------------------------|----------------|----------------|
| Goodness of fit on $F^2$           | 1.082          | 1.287          |
| $R_1, wR_2^a$ [ $I > 2\sigma(I)$ ] | 0.0832, 0.2296 | 0.0231, 0.0565 |
| $R_1, wR_2^a$ [all data]           | 0.0949, 0.2460 | 0.0283, 0.0584 |
| Residual (e·nm <sup>-3</sup> )     | 4.721/-2.636   | 0.995/-1.660   |

---


$$^a R_1 = \sum ||F_o| - |F_c|| / |F_o|, wR_2 = [\sum w(\sum F_o^2 - F_c^2)^2 / \sum w(F_o^2)^2]^{1/2}$$

Table S2 CIE coordinates of **1** at selected temperature

| Temperature (K) | CIE coordinates |
|-----------------|-----------------|
| 300             | (0.462, 0.473)  |
| 275             | (0.472, 0.478)  |
| 250             | (0.483, 0.476)  |
| 225             | (0.493, 0.474)  |
| 200             | (0.504, 0.469)  |
| 175             | (0.516, 0.461)  |
| 150             | (0.521, 0.456)  |
| 125             | (0.536, 0.445)  |
| 100             | (0.550, 0.435)  |
| 85              | (0.559, 0.427)  |
| 70              | (0.569, 0.420)  |
| 55              | (0.582, 0.409)  |
| 40              | (0.591, 0.402)  |
| 25              | (0.600, 0.394)  |
| 10              | (0.606, 0.389)  |

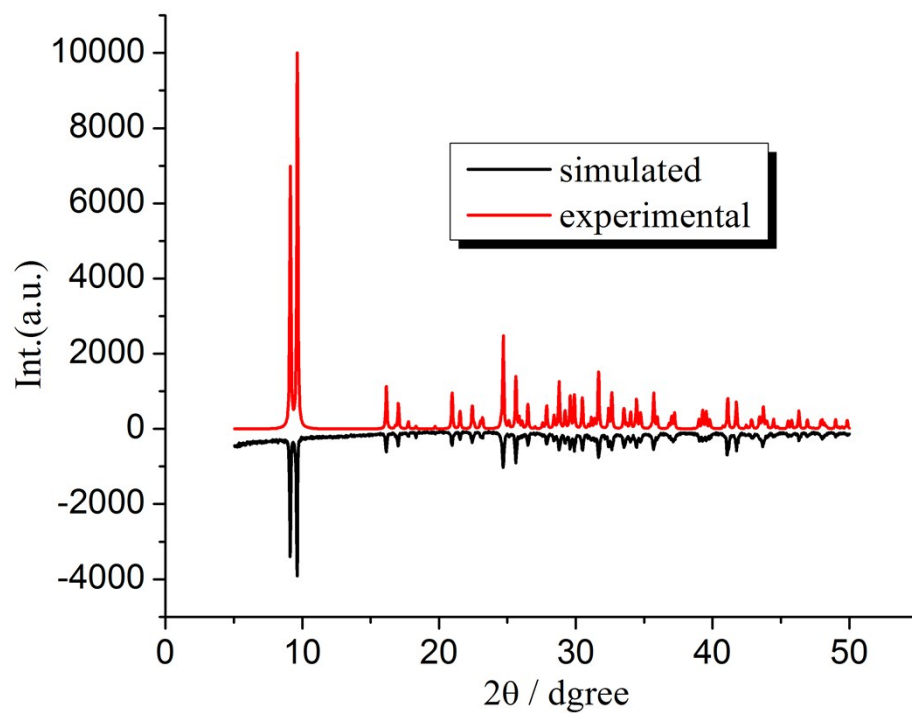

Figure S1 PXRD curve of **1** at room temperature

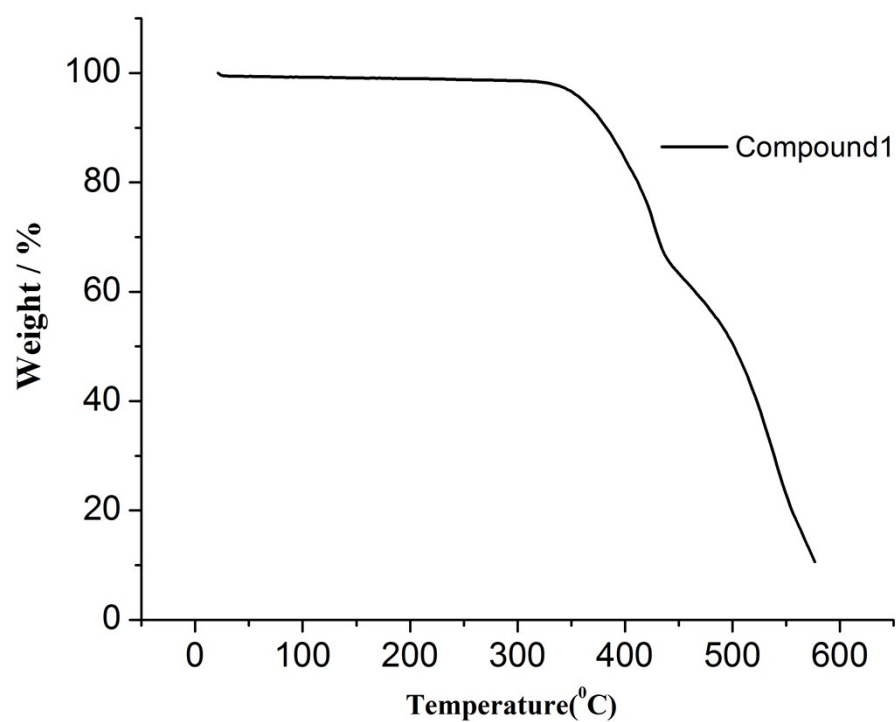

Figure S2 TG curve of **1**

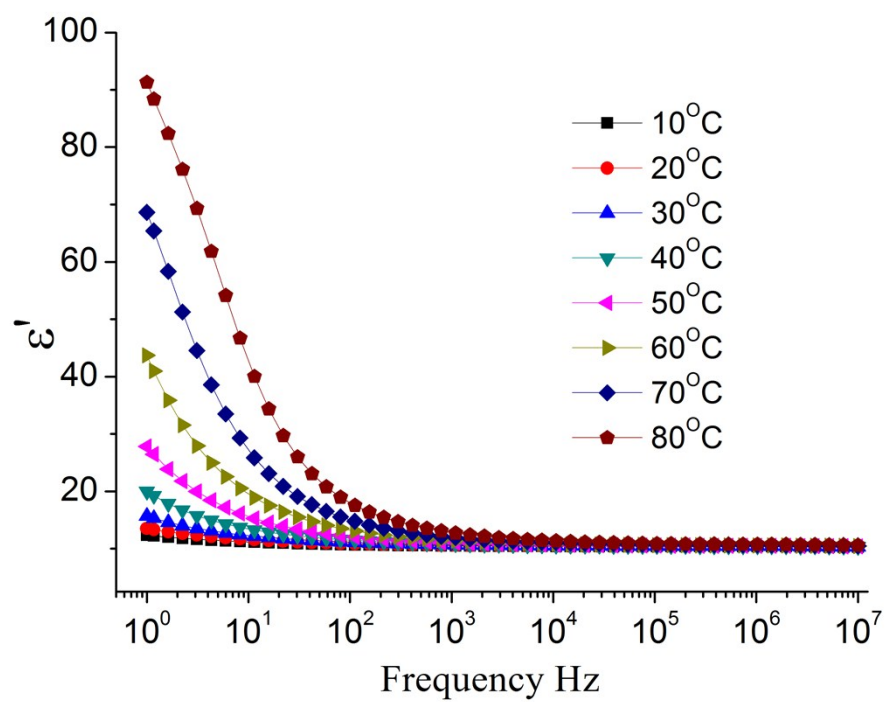

Figure S3 Frequency dependencies of the  $\epsilon'$  of **1** in the 10-80 °C temperature range

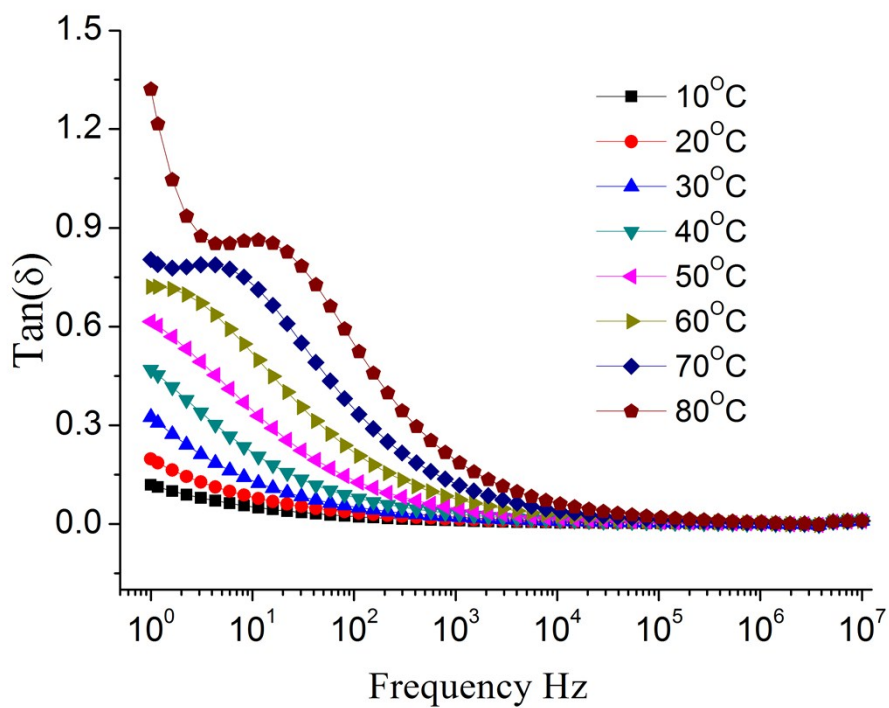

Figure S4 Frequency dependencies of  $\tan(\delta)$  of **1** in the 10-80 °C temperature range

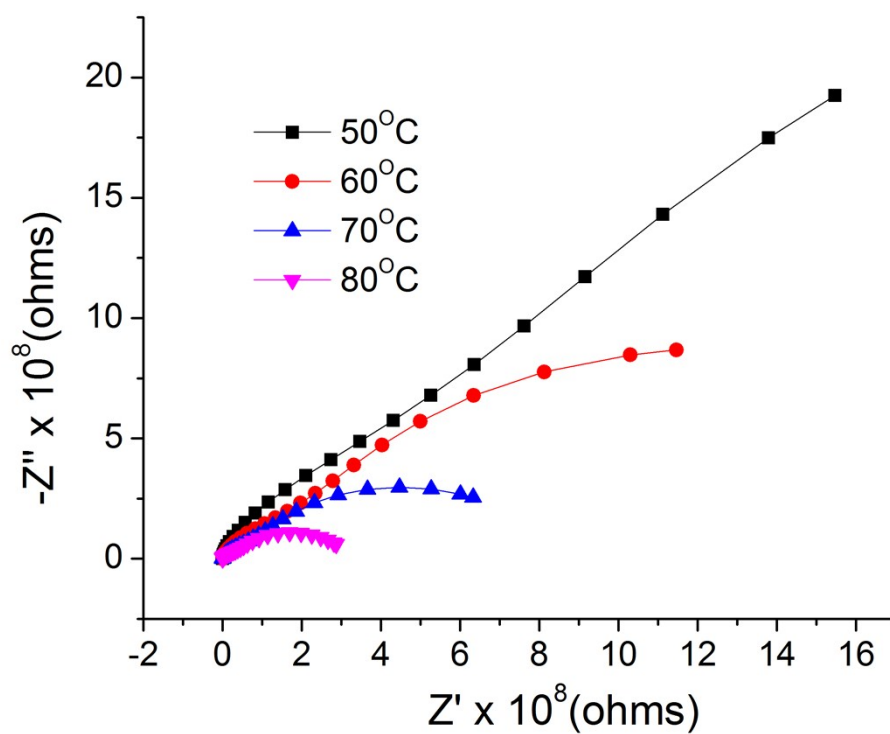

Figure S5 Complex impedance of **1** between 50 and 80 °C.

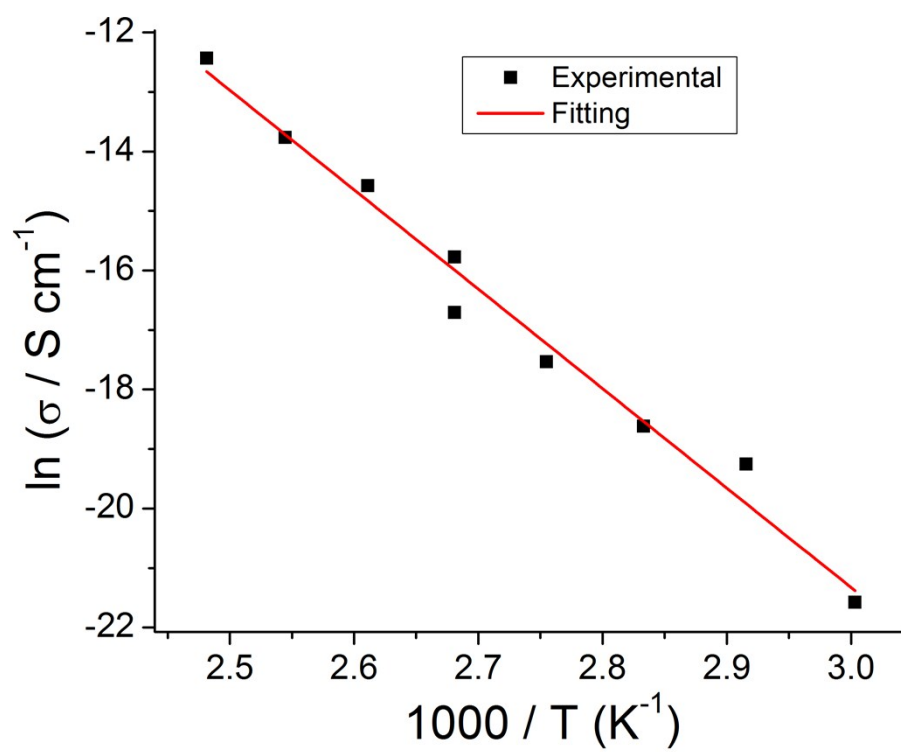

Figure S6 Arrhenius plots of **1** between 60 and 130 °C.

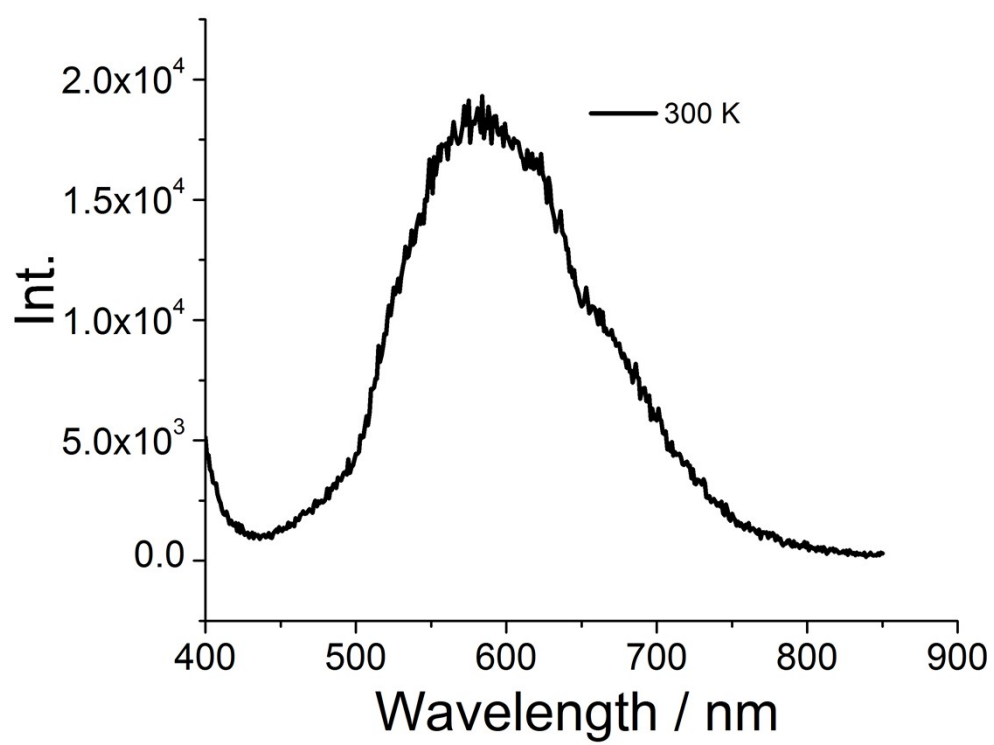

Figure S7 Emission spectra of **1** at room temperature
